# Supplementary material for: CD10-Bound Human Mesenchymal Stem/Stromal Cell-Derived Small Extracellular Vesicles Possess Immunomodulatory Cargo and Maintain Cartilage Homeostasis under Inflammatory Conditions
Source: MDPI journal article supplement (doi:10.3390/cells12141824), 2023-07-11

**Supplementary Table S2.** The colors for different evidence codes and for log scale in the g:Profiler functional enrichment analysis.

The colors for different evidence codes in the table:

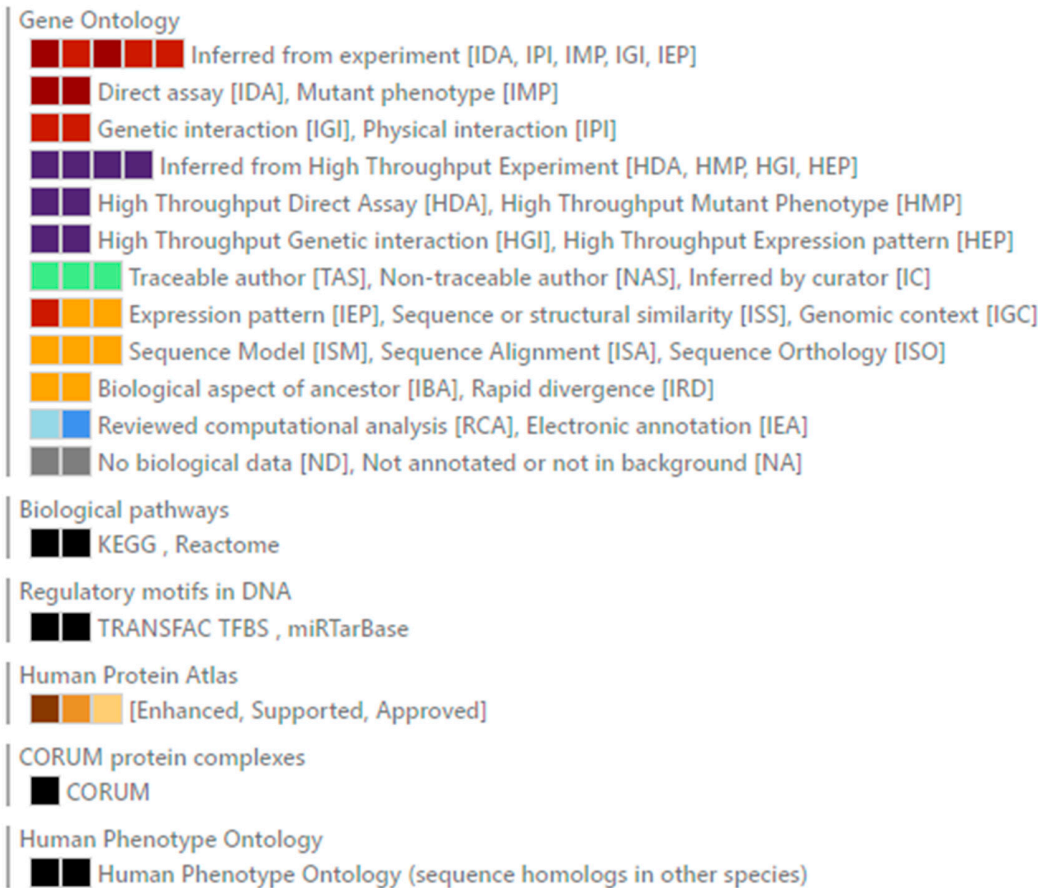

The colors for log scale:

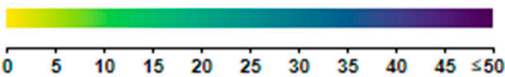

Supplement: s1 [file s1]
