# Supplementary material for: CD10-Bound Human Mesenchymal Stem/Stromal Cell-Derived Small Extracellular Vesicles Possess Immunomodulatory Cargo and Maintain Cartilage Homeostasis under Inflammatory Conditions
Source: Cells. 2023 Jul 11;12(14):1824. doi: 10.3390/cells12141824 (PMC10377825; doi:10.3390/cells12141824)
Supplement: Supplementary file 1 [file cells-12-01824-s001.zip › Supplementary Table S1.pdf]

**Supplementary Table S1.** Human mesenchymal stem cell qPCR array plate genes and their classification.

| <b>TRANSCRIPT NAME</b>                                                                                                                                                 | <b>CLASSIFICATION</b>     |
|------------------------------------------------------------------------------------------------------------------------------------------------------------------------|---------------------------|
| <i>PPARG, RHOA, CEBPA, CEBPB, LEPR</i>                                                                                                                                 | Adipogenic                |
| <i>HAT1, ITGAX, KAT2B, SOX9, ACAN, COL2A1, MMP13, CSPG4</i>                                                                                                            | Chondrogenic              |
| <i>BMP4, TGFB1, TGFB3, BMP6, KDR, MSX1, MSX2, BMP2, PRRX1</i>                                                                                                          | Chondrogenic / Osteogenic |
| <i>TWIST2, ANPEP, CASP3, CD44, ENG, ERBB2, FUT4, FZD9, ITGA6, ITGAV, MCAM, NGFR, NT5E, PDGFRB, PROM1, THY1, VCAM1, BDNF, CD200, COL10A1, FGF18, DLX2, DLX5, PDGFRA</i> | MSC                       |
| <i>CTNNB1, EGF, HGF, ICAM1, IFNG, IGF1, IL10, IL1B, IL6, ITGB1, KITLG, MMP2, NES, NUDT6, PTPRC, SLC17A5, TNF, VEGFA, VIM, VWF, JAG1, NOTCH1, GDF15, SMAD4, HIC1</i>    | MSC-related/Angiogenesis  |
| <i>ALPL, IBSP, SP7, BGLAP, BMP7, COL1A1, FGF10, HDAC1, PTK2, SMURF1, SMURF2, TBX5, RUNX2, FGF9</i>                                                                     | Osteogenic                |
| <i>FGF2, LIF, SOX2, TERT, GDF5</i>                                                                                                                                     | Stemness                  |
| <i>GAPDH, RN18S1, ACTB, TBP, UBC</i><br>Positive Control                                                                                                               | Housekeeping / Control    |
